# Supplementary material for: Impact of hydrogel microstructure and mechanics on the growth of zinc dendrites towards long-life flexible batteries
Source: Royal Society of Chemistry journal article supplement (doi:10.1039/d3ta01510f), 2023-01-01
Supplement: d3ta01510f1.pdf [file d3ta01510f1.pdf]

## Supporting information

### **Impact of hydrogel microstructure and mechanics on dendrite growth for flexible long-life zinc-ion battery**

Yang Yang, Huanlin Lyu, Qihong Wang, Faheem Mushtaq, Xian Xie, Fei Liu, Xiangkun  
Bo, Weilu Li, and Walid A. Daoud\*

Department of Mechanical Engineering, City University of Hong Kong, Tat Chee Avenue,  
Kowloon, Hong Kong, China

\*Corresponding author: [wdaoud@cityu.edu.hk](mailto:wdaoud@cityu.edu.hk)

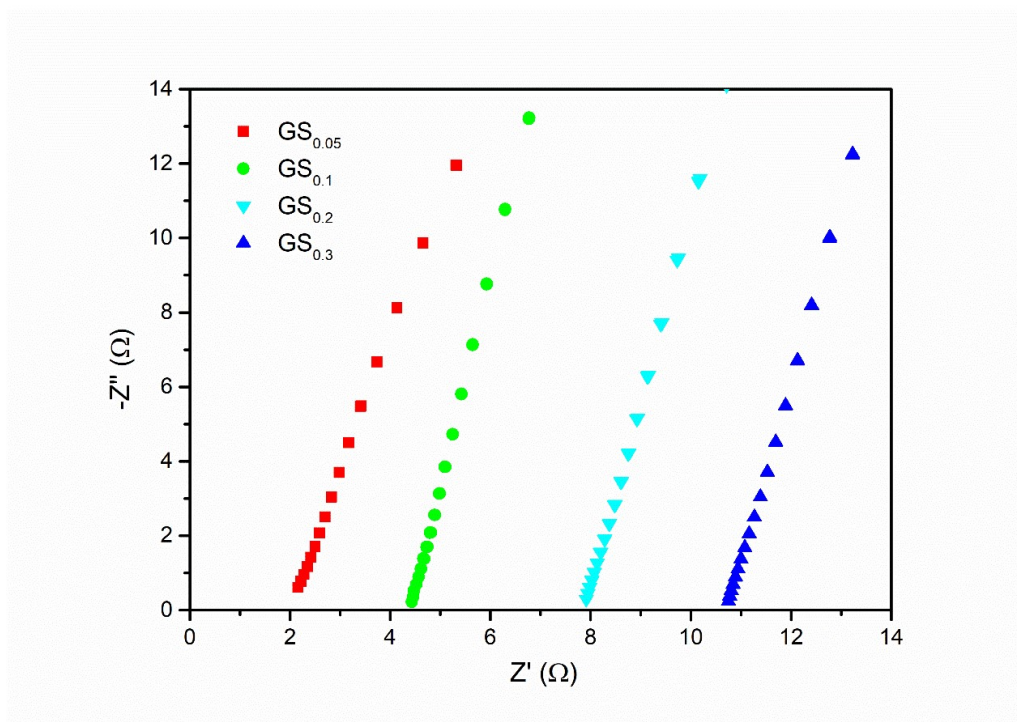

**Figure S1** Nyquist plots of  $\text{GS}_{x(x=0.05-0.3)}$  electrolyte, measured in a Zn// electrolyte// Zn configuration.

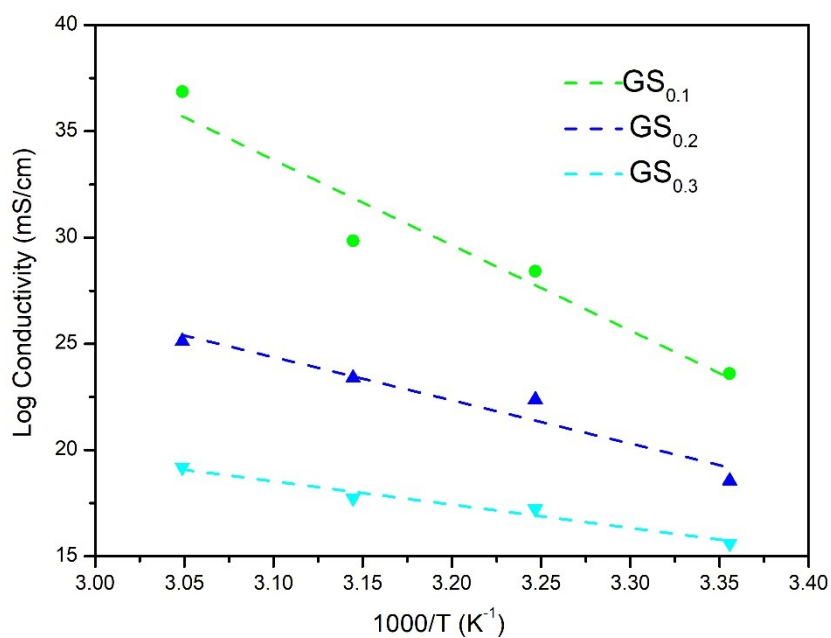

**Figure S2** Arrhenius plots of  $\text{GS}_{x(x=0.1-0.3)}$  electrolyte, measured in a Zn// electrolyte// Zn configuration.

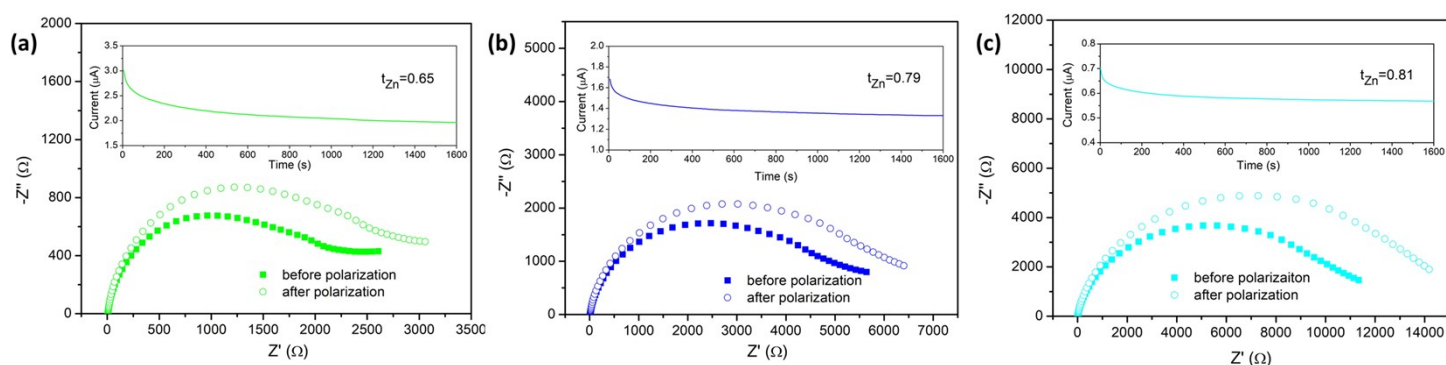

**Fig S3** Impedance spectra of symmetric cells with (a)GS<sub>0.1</sub>, (b) GS<sub>0.2</sub> and (c) GS<sub>0.3</sub> before and after polarization. The insets show the corresponding current-time curves.

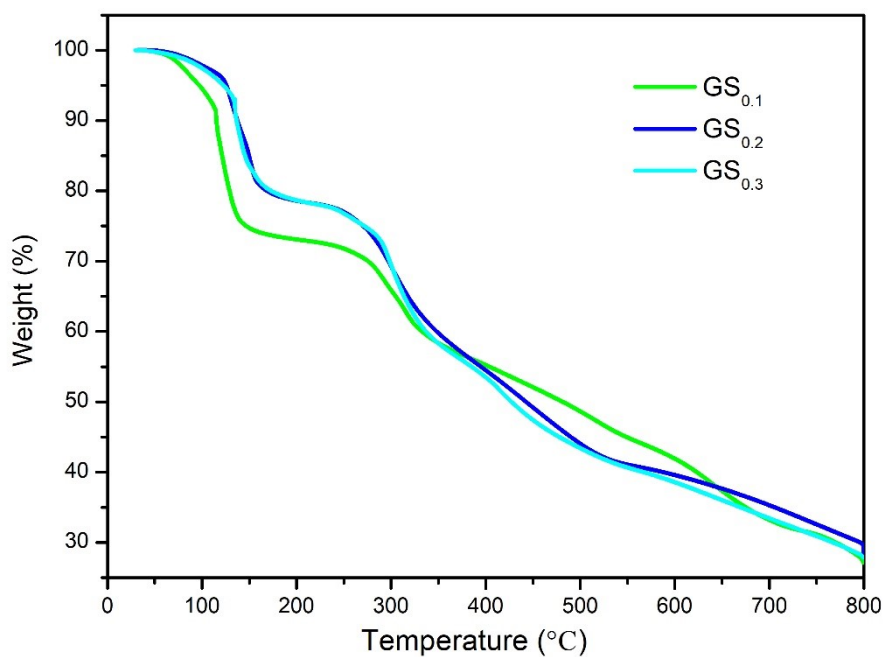

**Fig S4** TGA curves of GS<sub>0.1-0.3</sub>. The initial weight loss in all samples at 90-150°C is attributed to the loss of water. Above that, the slight weight loss in the temperature window of 150-270°C is attributed to the loss of crystalline water of zinc sulfate hydrate. At 270-500°C, the weight loss is attributed to the degradation of gelatin.<sup>R1</sup>

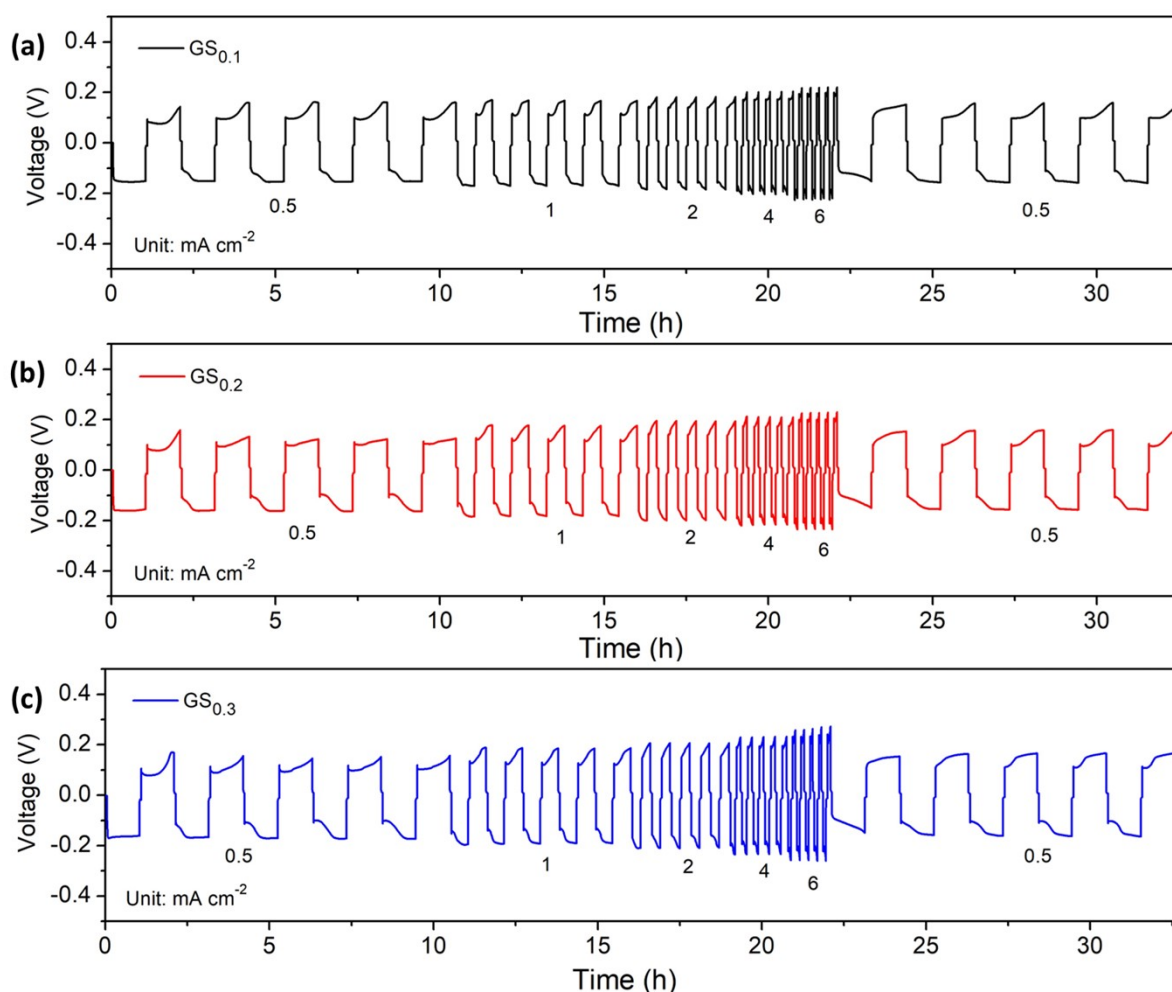

**Fig S5** Rate performance of the symmetric cells with (a)GS<sub>0.1</sub>, (b)GS<sub>0.2</sub> and (c)GS<sub>0.3</sub> electrolyte.

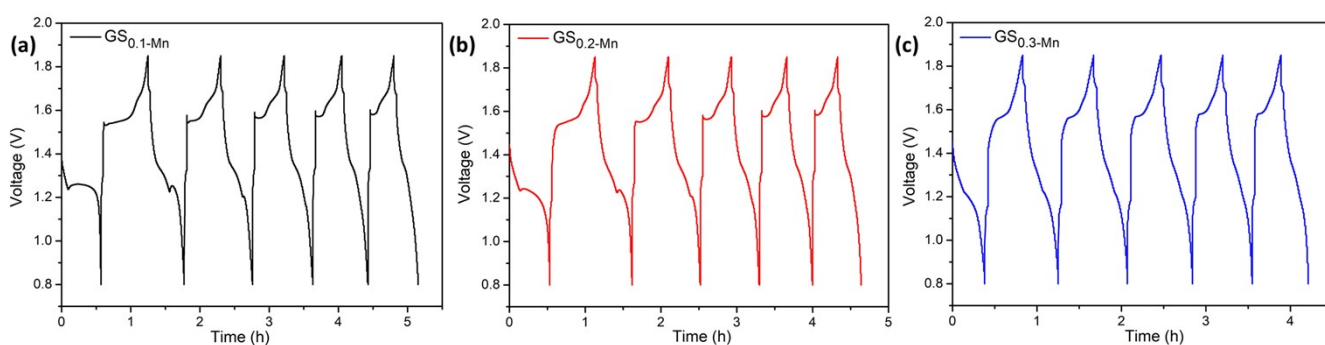

**Fig S6** Galvanostatic voltage profiles of Zn-MnO<sub>2</sub> full-cell batteries with (a) GS<sub>0.1</sub>, (b) GS<sub>0.2</sub>, and (c) GS<sub>0.3</sub> at 0.5 A g<sup>-1</sup>. At the current density of 0.5 A g<sup>-1</sup>, the full-cell batteries based on GS<sub>0.1-0.3</sub> in 0.2 M MnSO<sub>4</sub> show a capacity of 321.5 mAh g<sup>-1</sup>, 281.6 mAh g<sup>-1</sup> and 205.5 mAh g<sup>-1</sup>, respectively.

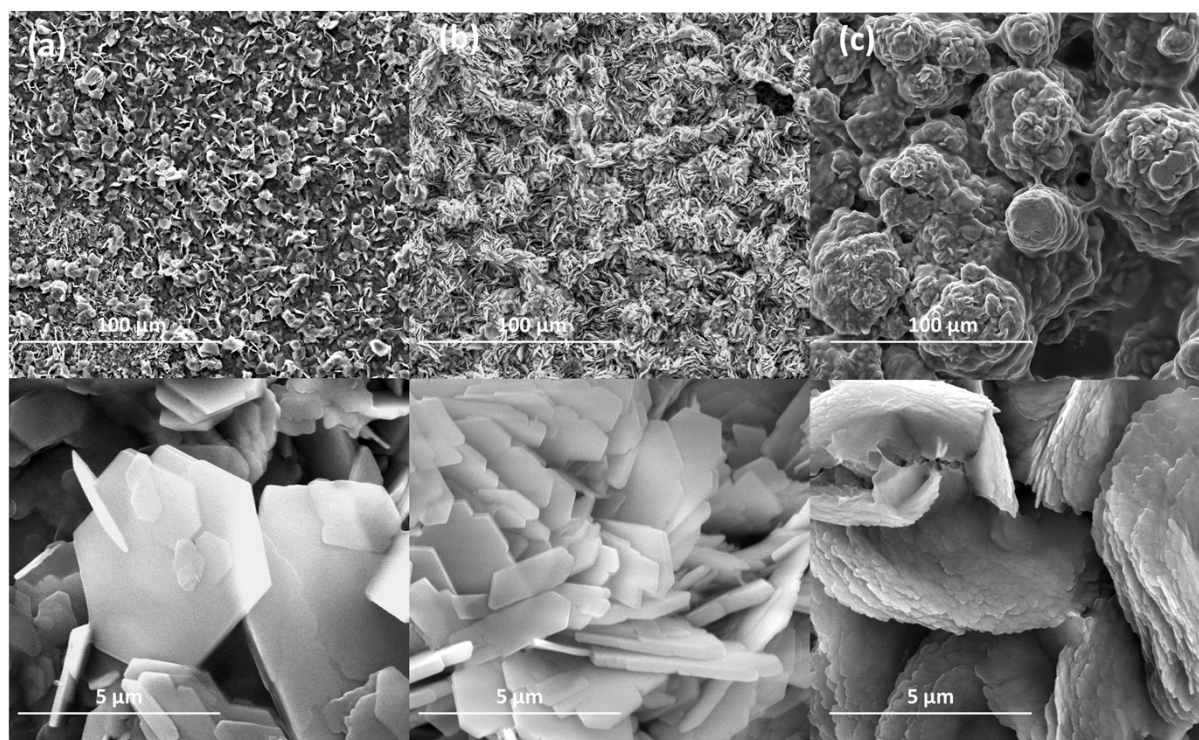

**Figure S7** Surface morphology of zinc electrodes after 400 cycles in symmetric cells with (a) GS<sub>0.1</sub>, (b) GS<sub>0.2</sub> and (c) GS<sub>0.3</sub>.



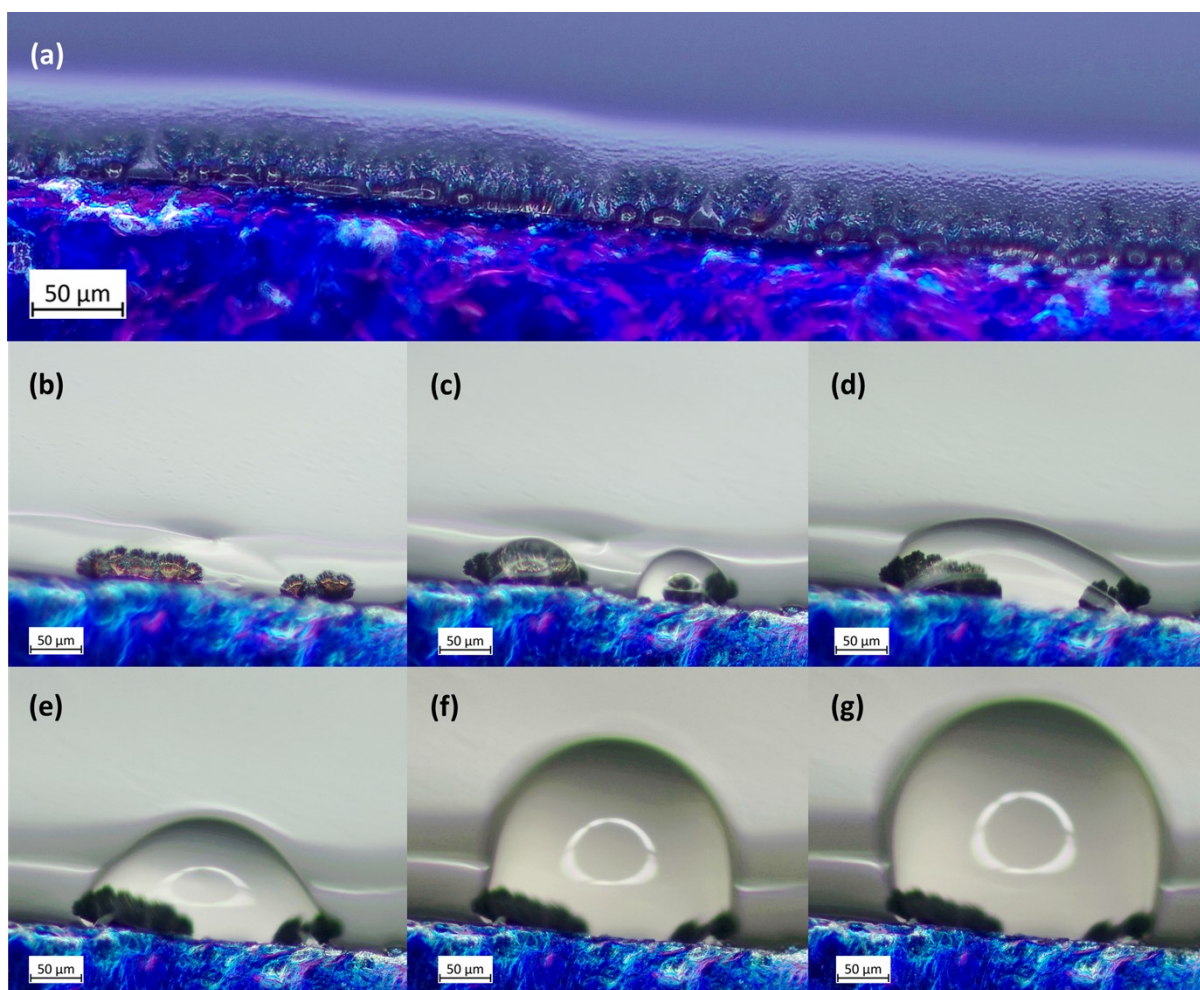

**Figure S8** OM images of (a) water bubble generation in  $GX_{0.3}$ ; (b-g) water bubble evolution in  $GX_{0.2}$ , at  $4 \text{ mA cm}^{-2}$ , during the 15-minute discharge process.

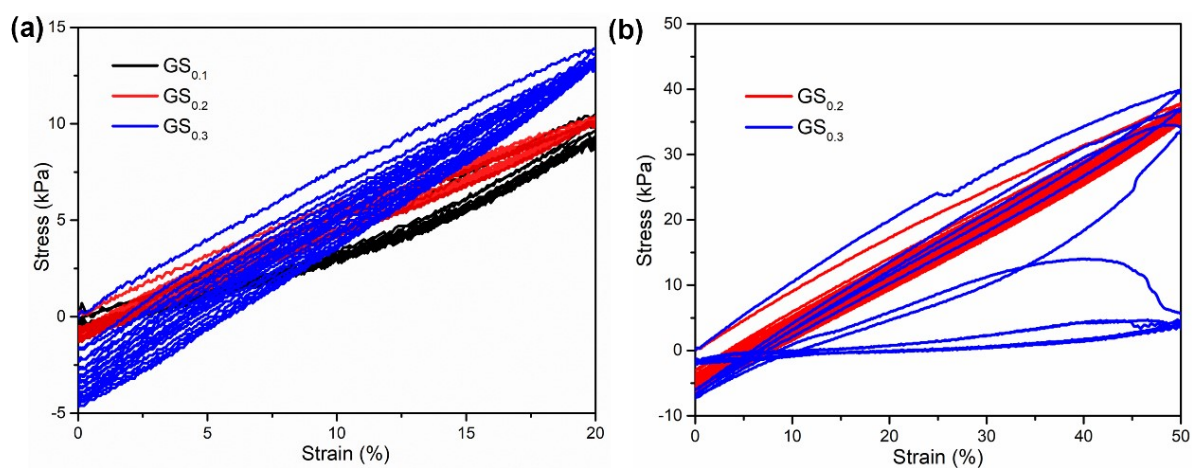

**Figure S9** Ten consecutive loading-unloading tensile cycles of: (a)  $GS_{0.1-0.3}$  hydrogel under 20% strain; (b)  $GS_{0.2,0.3}$  hydrogel under 50% strain.

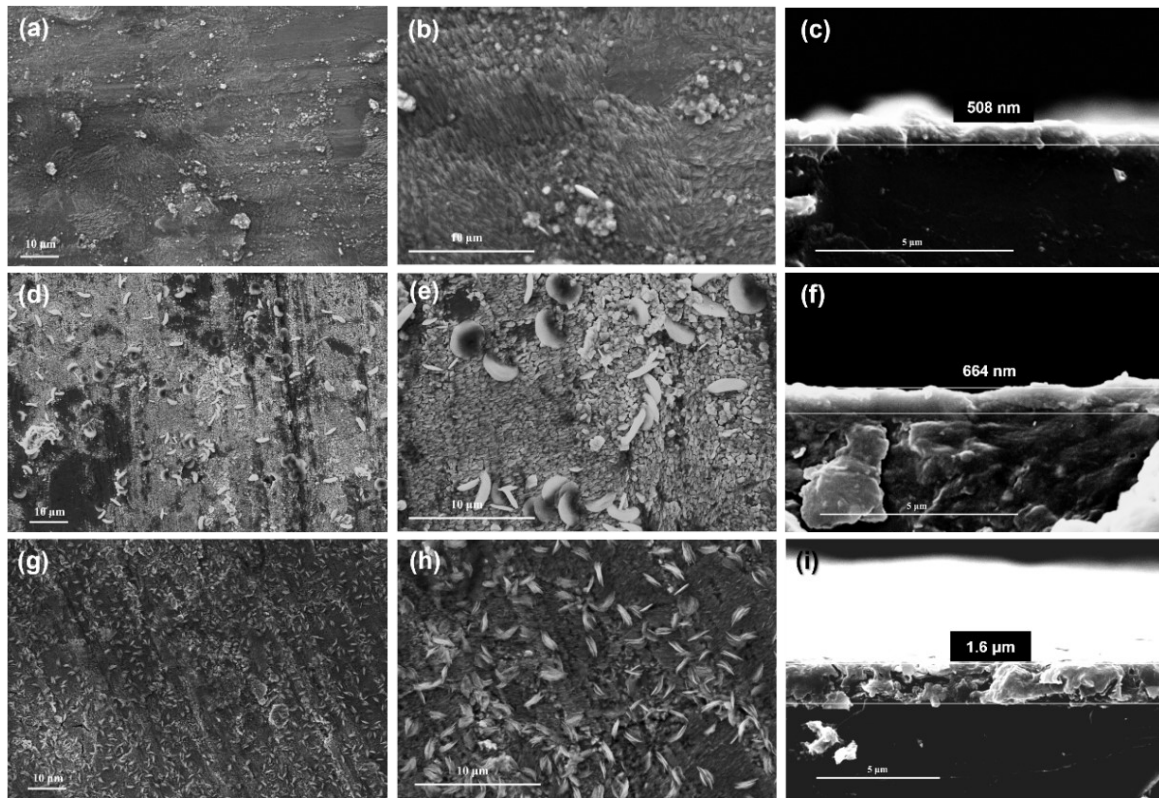

**Figure S10** Morphology evolution of zinc electrode in GS0.2 after plating/stripping for 1 cycle at different current densities: (a, d, g) top-view of zinc electrodes cycled at 0.5, 1.0 and 2.0 mA cm<sup>-2</sup>; (b, e, h) microstructure of zinc layer of (a, d, g); (c, f, i) cross-section of (a, d, g).

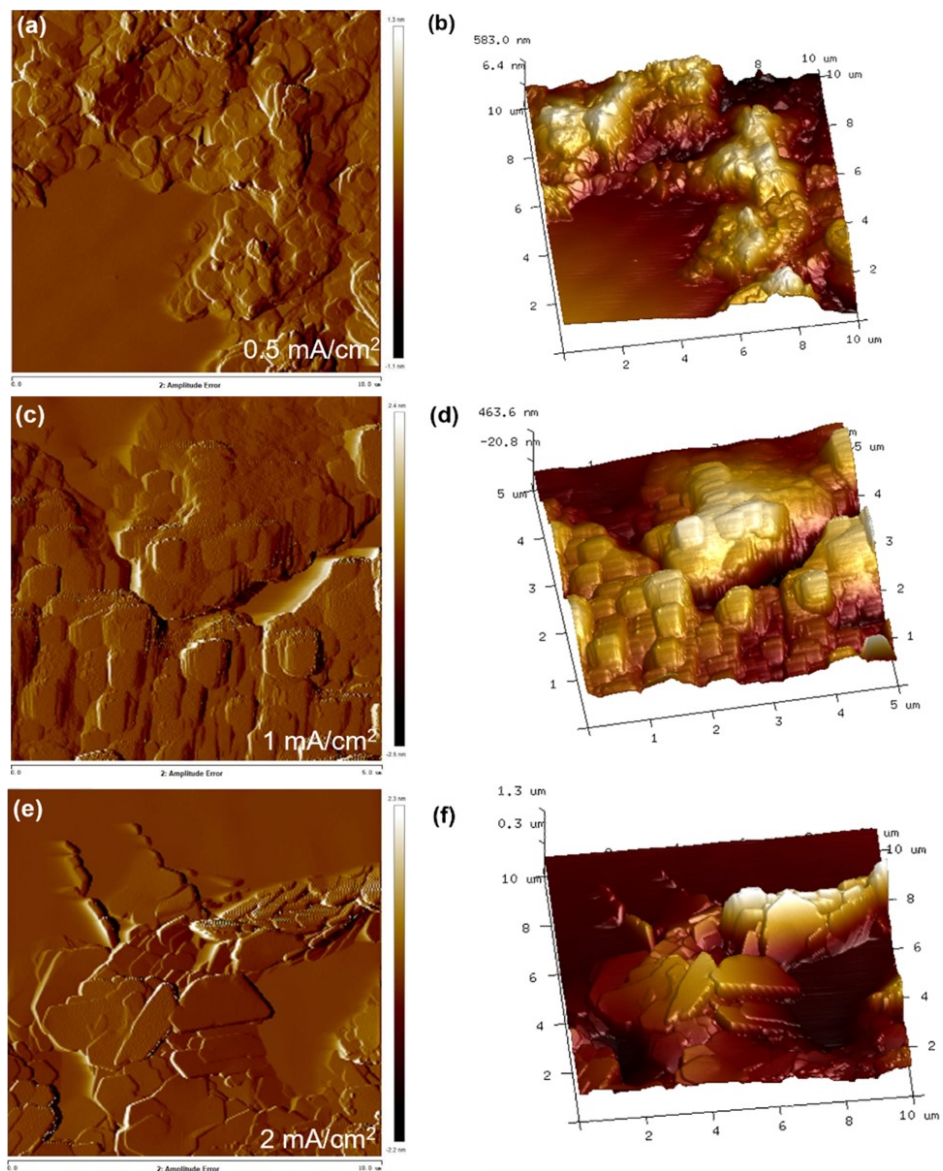

**Fig S11** AFM images of zinc electrodes cycled at different current densities of  $0.5 \text{ mA cm}^{-2}$  (a, b),  $1.0 \text{ mA cm}^{-2}$  (c, d),  $2.0 \text{ mA cm}^{-2}$  (e, f), plating/stripping capacity is  $0.5 \text{ mAh cm}^{-2}$ .

Reference:

R1 D. Kotatha, M. Hirata, M. Ogino, S. Uchida, M. Ishikawa, T. Furuike and H. Tamura, *Journal of Nanotechnology*, 2019, **2019**.
